# Supplementary material for: False-positive findings in Cochrane meta-analyses with and without application of trial sequential analysis: an empirical review
Source: PubMed Central journal article supplement — BMJ Open. 2016 Aug 12;6(8):e011890. doi: 10.1136/bmjopen-2016-011890 (PMC4985805; doi:10.1136/bmjopen-2016-011890), 2016-08-12
Supplement: bmjopen-2016-011890supp_appendix1.pdf [file bmjopen-2016-011890supp_appendix1.pdf]

## Appendix 1

Characteristics of the non-significant cumulative meta-analyses included with a required information size based on a RRR 10%

| <b>Systematic Review</b> | <b>Title</b>                                                                                                                                 | <b>Comparison</b>                                                              | <b>Outcome</b>                          | <b>Trials</b> | <b>Participants</b> | <b>Diversity</b> |
|--------------------------|----------------------------------------------------------------------------------------------------------------------------------------------|--------------------------------------------------------------------------------|-----------------------------------------|---------------|---------------------|------------------|
| Alfirevic 2010           | Fetal and umbilical doppler ultrasound in normal pregnancy                                                                                   | All routine doppler u/s vs no doppler u/s                                      | Spontaneous vaginal birth               | 2             | 6373                | 0                |
| Avenell 2009             | Vitamin D and vitamin D analogues for preventing fractures associated with involutional and post-menopausal osteoporosis                     | Vitamin D or any analogue with/without calcium vs control                      | Deaths                                  | 23            | 64423               | 0                |
| Berge 2011               | Anticoagulants versus antiplatelet agents for acute ischaemic stroke                                                                         | Anticoagulants vs anti-platelet agents                                         | Death or dependency at end of follow-up | 3             | 11527               | 0                |
| Bilio 2010               | Serotonin receptor antagonists for highly emetogenic chemotherapy in adults                                                                  | Granisetron vs ondansetron                                                     | Absence of vomiting                     | 8             | 4256                | 0                |
| Chen 2010                | Calcium channel blockers versus other classes of drugs for hypertension                                                                      | Calcium channel blockers vs diuretics                                          | Mortality – all cause                   | 5             | 35057               | 0                |
| Cortes-Jofre 2012        | Drugs for preventing lung cancer in healthy people                                                                                           | Vit A vs placebo                                                               | Incidence all cancer                    | 3             | 44267               | 0                |
| Dowswell 2010            | Alternative versus standard packages of antenatal care for low-risk pregnancy                                                                | Decreased antenatal visits vs standard                                         | Alpha feto protein                      | 2             | 2792                | 0                |
| Ducharme 2010            | Addition of long-acting beta2-agonists to inhaled corticosteroids versus same dose inhaled                                                   | Long acting beta-agonists and inhaled steroids vs inhaled steroids alone       | Total number adverse events             | 41            | 10622               | 0                |
| Ducharme 2010 (2)        | Addition of long-acting beta2-agonists to inhaled steroids versus higher dose inhaled steroids in adults and children with persistent asthma | Long-acting beta agonists and inhaled corticosteroids (ICS) vs higher dose ICS | Adverse events                          | 30            | 11483               | 0.38             |
| Duley 2010               | Antiplatelet agents for preventing pre-eclampsia and its complications                                                                       | Antiplatelet agents vs placebo                                                 | Caesarean sections                      | 24            | 31834               | 0.33             |
| Ellis 2010               | Stroke liaison workers for stroke patients and carers: an individual patient data meta-analysis                                              | Stroke liaison workers vs usual care                                           | Barthel dependency                      | 11            | 2280                | 0                |
| Gibson 2009              | Aromatase inhibitors for treatment of advanced breast cancer in postmenopausal women                                                         | Aromatase inhibitors as 2nd line therapy vs any other                          | Clinical assessable (assessable)        | 16            | 5410                | 0                |
| Hemmingsen 2013          | Sulphonylurea monotherapy for patients with type 2 diabetes mellitus                                                                         | Sulphonylureas vs metformin                                                    | Adverse events                          | 5             | 3118                | 0                |

|                        |                                                                                                                       |                                                                   |                                                       |    |        |      |
|------------------------|-----------------------------------------------------------------------------------------------------------------------|-------------------------------------------------------------------|-------------------------------------------------------|----|--------|------|
| Heran 2012             | Angiotensin receptor blockers for heart failure                                                                       | Angiotensin receptor blockers vs placebo (LVEF>40%)               | Total hospitalisations                                | 2  | 7151   | 0    |
| Hetrick 2012           | Newer generation antidepressants for depressive disorders in children and adolescents                                 | Newer generation antidepressants vs placebo                       | Completion of trial protocol                          | 16 | 3290   | 0.47 |
| Hewitson 2011          | Screening for colorectal cancer using faecal occult blood                                                             | Screening vs control                                              | All-cause mortality                                   | 4  | 329642 | 0    |
| Hodnett 2013           | Continuous support for women during childbirth                                                                        | Continuous support vs usual care                                  | Perineal trauma                                       | 4  | 8120   | 0.45 |
| Holme 2013             | Flexible sigmoidoscopy versus faecal occult blood testing for colorectal cancer screening in asymptomatic individuals | Flexible sigmoidoscopy vs control                                 | All-cause mortality                                   | 4  | 359999 | 0.64 |
| Hooper 2012            | Reduced or modified dietary fat for preventing cardiovascular disease                                                 | Fat decrease vs normal diet                                       | Mortality                                             | 21 | 71790  | 0    |
| Horay 2013             | Interventions for supporting pregnant women's decision-making about mode of birth after a caesarean                   | Decision support intervention vs usual care                       | Planned mode of birth – vaginal birth after caesarean | 3  | 2071   | 0    |
| Justus Hofmeyr 2010    | Calcium supplementation during pregnancy for preventing hypertensive disorders and related problems                   | Calcium vs control                                                | Caesarian section                                     | 8  | 15234  | 0    |
| Karner 2012            | Tiotropium versus placebo for chronic obstructive pulmonary disease                                                   | Tiotropium vs placebo                                             | Patients with >1 serious adverse event (non-fatal)    | 22 | 23309  | 0    |
| Kenyon 2010            | Antibiotics for preterm rupture of membranes                                                                          | Any antibiotics vs placebo                                        | Birth before 37 weeks' gestation                      | 3  | 4931   | 0    |
| Lafuente Lafuente 2013 | Active chest compression-decompression for cardiopulmonary resuscitation                                              | Active chest compression-decompression CPR vs standard manual CPR | Immediate mortality                                   | 10 | 4162   | 0.56 |
| Lawrence 2013          | Maternal positions and mobility during first stage labour                                                             | Upright vs recumbent                                              | Mode of birth – spontaneous vaginal                   | 14 | 2626   | 0.71 |
| Lui 2013               | Gamma aminobutyric acid (GABA) receptor agonists for acute stroke                                                     | GABA agonist vs placebo                                           | Death or dependency                                   | 5  | 3758   | 0    |
| Mutter 2013            | Hydroxyethyl starch (HES) versus other fluid therapies: effects on kidney function                                    | HES vs other fluid                                                | RIFLE (risk or worse)                                 | 20 | 8768   | 0    |
| Nannini 2012           | Combined corticosteroid and long-acting beta2-agonist in one inhaler versus long-acting beta2-agonists for chronic    | Fluticasone and salmeterol (FPS) versus salmeterol (SAL)          | Adverse events – any event                            | 9  | 8250   | 0.5  |

|                      |                                                                                                                                             |                                                                                       |                                                |    |       |      |
|----------------------|---------------------------------------------------------------------------------------------------------------------------------------------|---------------------------------------------------------------------------------------|------------------------------------------------|----|-------|------|
|                      | obstructive pulmonary disease                                                                                                               |                                                                                       |                                                |    |       |      |
| Ni Chroinin 2009     | Addition of long-acting beta2-agonists to inhaled steroids as first line therapy for persistent asthma in steroid-naive adults and children | Inhaled corticosteroids and long-acting beta agonist vs inhaled corticosteroids alone | Patient with any adverse event                 | 14 | 3286  | 0    |
| Ni Chroinin 2009 (2) | Addition of long-acting beta-agonists to inhaled corticosteroids for chronic asthma in children                                             | Long active beta 2 agonists vs placebo                                                | Total number of adverse events                 | 15 | 3284  | 0    |
| Palmer 2013 (2)      | HMG CoA reductase inhibitors (statins) for dialysis patients                                                                                | Statins vs control                                                                    | All-cause mortality                            | 13 | 4705  | 0    |
| Perez 2009           | Effect of early treatment with anti-hypertensive drugs on short and long-term mortality in patients with an acute cardiovascular event      | Beta blockers vs control                                                              | All cause mortality at 10 days                 | 20 | 72600 | 0    |
| Pucci 2011           | Natalizumab for relapsing remitting multiple sclerosis                                                                                      | Natalizumab vs control                                                                | No of patients with at least one adverse event | 3  | 2220  | 0    |
| Sandall 2013         | Midwife-led continuity models versus other models of care for childbearing women                                                            | Midwife-led care vs other models of care                                              | Perineal laceration requiring suturing         | 9  | 13412 | 0.59 |
| Schmidt 2011         | Maximal androgen blockade for advanced prostate cancer                                                                                      | Maximal androgen blockade vs monotherapy                                              | Overall survival one year                      | 13 | 4970  | 0.41 |
| Shah 2009            | Antistaphylococcal immunoglobulins to prevent staphylococcal infection in very low birth weight infants                                     | Anti-staphylococcal immunoglobulin vs placebo                                         | Chronic lung disease at 28 days                | 2  | 2488  | 0    |
| Siegfried 2009       | Male circumcision for prevention of heterosexual acquisition of HIV in men                                                                  | Circumcision vs no circumcision                                                       | Inconsistent/no condom use                     | 2  | 6567  | 0.39 |
| Soares-Weiser 2012   | Vaccines for preventing rotavirus diarrhoea: vaccines in use                                                                                | RV1 vs placebo                                                                        | Reactogenicity, fever, end of follow-up        | 16 | 8799  | 0    |
| Spencer 2011         | Inhaled corticosteroids versus long-active beta2-agonists for chronic obstructive pulmonary                                                 | Inhaled steroids vs long acting beta agonists                                         | Adverse events                                 | 5  | 5089  | 0    |
| Stewart 2011         | Chemotherapy for advanced ovarian cancer                                                                                                    | Single vs combination platinum                                                        | Survival                                       | 16 | 3146  | 0    |
| Sze 2011             | Palliation of metastatic bone pain: single fraction versus multifraction radiotherapy                                                       | Single fraction vs multi-fraction radiotherapy                                        | Overall response                               | 13 | 3548  | 0.06 |
| Tacklind 2012        | Finasteride for benign prostatic hyperplasia                                                                                                | Finasteride vs placebo                                                                | Any adverse event                              | 4  | 5556  | 0.71 |
| Taylor 2013          | Statins for the primary                                                                                                                     | Statins vs                                                                            | Number of                                      | 12 | 40716 | 0.88 |

|                |                                                                                                                                                      |                                                                    |                                           |    |       |      |
|----------------|------------------------------------------------------------------------------------------------------------------------------------------------------|--------------------------------------------------------------------|-------------------------------------------|----|-------|------|
|                | prevention of cardiovascular disease                                                                                                                 | placebo                                                            | study participants who had adverse events |    |       |      |
| Tonia 2012     | Erythropoietin or darbepoetin for patients with cancer                                                                                               | EPO or darbepoetin vs placebo                                      | Complete tumour response                  | 19 | 5012  | 0    |
| Tse 2011       | Guidewire-assisted cannulation of the common bile duct for the prevention of post-endoscopic retrograde cholangiopancreatography (ERCP) pancreatitis | Guidewire assisted cannulation vs contrast assisted cannulation    | Overall cannulation success               | 12 | 3450  | 0.53 |
| Van Vliet 2011 | Triphasic vs Monophasic oral contraceptives for contraception                                                                                        | Triphasic vs monophasic                                            | Total discontinuation within 12 cycles    | 4  | 3310  | 0.05 |
| Wei 2013       | Early amniotomy and early oxytocin for prevention of, or therapy for, delay in first stage spontaneous labour compared with routine care             | Early amniotomy and oxytocin vs routine care                       | Spontaneous vaginal delivery              | 12 | 6020  | 0    |
| Whitworth 2010 | Ultrasound for fetal assessment in early pregnancy                                                                                                   | Routine (revealed) vs selective (concealed) U/S in early pregnancy | C-section                                 | 5  | 22193 | 0    |
| Zhang 2012     | Calcium antagonists for acute ischemic stroke                                                                                                        | Calcium antagonists vs control                                     | Primary outcomes                          | 22 | 6684  | 0.74 |
| Zhang 2012 (2) | Acellular vaccines for preventing whooping cough in children                                                                                         | Acellular vaccine vs placebo (Primary series - dose 1)             | Irritability/fretfulness                  | 2  | 11526 | 0    |
