# Supplementary material for: False-positive findings in Cochrane meta-analyses with and without application of trial sequential analysis: an empirical review
Source: PubMed Central journal article supplement — BMJ Open. 2016 Aug 12;6(8):e011890. doi: 10.1136/bmjopen-2016-011890 (PMC4985805; doi:10.1136/bmjopen-2016-011890), 2016-08-12
Supplement: bmjopen-2016-011890supp_appendix2.pdf [file bmjopen-2016-011890supp_appendix2.pdf]

## Appendix 2

Characteristics of the non-significant cumulative meta-analyses included with a required information size based on a NNT of 100

| Systematic Review | Title                                                                                                                                                                                     | Comparison                                                                | Outcome                                                              | Trials | Participants | Diversity |
|-------------------|-------------------------------------------------------------------------------------------------------------------------------------------------------------------------------------------|---------------------------------------------------------------------------|----------------------------------------------------------------------|--------|--------------|-----------|
| Alfirevic 2013    | Continuous cardiotocography (CTG) as a form of electronic fetal monitoring (EFM) for fetal                                                                                                | CTG vs auscultation                                                       | Neonatal ICU admission                                               | 10     | 33167        | 0.68      |
| Arsenault 2013    | Interventions for preventing post-operative atrial fibrillation in patients undergoing heart surgery                                                                                      | Any treatment vs none                                                     | Mortality                                                            | 51     | 7703         | 0         |
| Bonati 2012       | Percutaneous transluminal balloon angioplasty and stenting for carotid artery stenosis                                                                                                    | Endovascular vs endarterectomy (standard surgical risk)                   | Death of any cause                                                   | 7      | 6760         | 0         |
| Bosch 2013        | Platelet glycoprotein IIb/IIIa blockers during percutaneous coronary intervention and as the initial medical treatment of non-ST segment elevation acute coronary syndromes               | Glycoprotein IIb / IIIa blockers vs control                               | 2-6 month mortality                                                  | 11     | 6284         | 0         |
| Brocklehurst 2013 | Antibiotics for treating bacterial vaginosis in pregnancy                                                                                                                                 | Any antibiotics vs placebo                                                | Perinatal death                                                      | 2      | 2397         | 0         |
| Bruins 2013       | Factor Xa inhibitors versus vitamin K antagonists for preventing cerebral or systemic embolism in patients with atrial fibrillation                                                       | Factor Xa inhibitor vs vitamin K antagonists                              | Ischaemic strokes                                                    | 8      | 39606        | 0.18      |
| Cates 2013        | Regular treatment with formoterol and inhaled steroids for chronic asthma: serious adverse events                                                                                         | Formeterol & inhaled corticosteroids vs same dose inhaled corticosteroids | All cause non-fatal serious adverse events in adults and adolescents | 22     | 10389        | 0         |
| Cates 2013 (2)    | Combination formoterol and budesonide as maintenance and reliever therapy versus current best practice (including inhaled steroid maintenance), for chronic asthma in adults and children | 160/4.5mcg BDF vs current best practice                                   | Patients with exacerbations causing hospitalisations                 | 8      | 8841         | 0         |
| Cates 2013 (3)    | Regular treatment with salmeterol and inhaled steroids for chronic asthma: serious adverse events                                                                                         | Salmeterol and inhaled corticosteroids vs inhaled corticosteroids         | All cause non-fatal serious side effects                             | 35     | 14548        | 0         |
| Cheng 2012        | Interventions for emergency contraception                                                                                                                                                 | Levonorgestrel single dose vs split dose                                  | Observed number of pregnancies                                       | 3      | 6653         | 0         |
| Crowther          | Repeat doses of prenatal                                                                                                                                                                  | Repeat doses of                                                           | Intraventric                                                         | 6      | 4819         | 0.25      |

|                 |                                                                                                                                |                                                 |                                      |    |        |      |
|-----------------|--------------------------------------------------------------------------------------------------------------------------------|-------------------------------------------------|--------------------------------------|----|--------|------|
| 2013            | corticosteroids for women at risk of preterm birth for improving neonatal health outcomes                                      | corticosteroids vs single course                | ular haemorrhage grade ¼             |    |        |      |
| Devane 2012     | Cardiotocography versus intermittent auscultation of fetal heart on admission to labour ward for assessment of fetal wellbeing | Admission CTG vs intermittent auscultation      | Admission to neonatal intensive care | 4  | 11331  | 0    |
| Diao 2012       | Pharmacotherapy for mild hypertension                                                                                          | Treatment vs no treatment                       | Mortality                            | 4  | 8912   | 0    |
| Di Nisio 2012   | Primary prophylaxis for venous thromboembolism in ambulatory cancer patients receiving chemotherapy                            | LMWH vs placebo                                 | Major bleeding                       | 5  | 2394   | 0    |
| Dodd 2013       | Prenatal administration of progesterone for preventing preterm birth in women considered to be at risk of preterm birth        | Progesterone vs placebo in multiple pregnancies | Intraventricular haemorrhage         | 2  | 2688   | 0    |
| Evans 2012      | Antioxidant vitamin and mineral supplements for preventing age-related macular degeneration                                    | Antioxidants vs placebo                         | Acute macular degeneration           | 4  | 62520  | 0.18 |
| Formosa 2012    | Short and long term effects of tibolone in postmenopausal women                                                                | Tibolone vs placebo                             | Mortality                            | 2  | 7639   | 0    |
| Gagliardi 2012  | Vaccines for preventing herpes zoster in older adults                                                                          | Herpes vaccine vs nil                           | Dropouts – for any reason            | 3  | 38916  | 0    |
| Galaal 2012     | Laparoscopy versus laparotomy for the management of early stage endometrial cancer                                             | Laparoscopy vs laparotomy                       | Perioperative death                  | 2  | 2874   | 0    |
| Gotzsche 2013   | Screening for breast cancer with mammography                                                                                   | Screening vs no screening – all women           | Deaths ascribed to any cancer        | 3  | 132118 | 0.61 |
| Grimes 2012     | Antibiotic prophylaxis for intrauterine contraceptive device insertion                                                         | Antibiotics vs placebo                          | Pelvic inflammatory disease          | 6  | 5797   | 0    |
| Grocott 2012    | Perioperative increase in global blood flow to explicit defined goals and outcomes following surgery                           | Any global blood flow algorithm vs none         | Venous thrombosis                    | 8  | 2592   | 0.14 |
| Gulmezoglu 2012 | Induction of labour for improving birth outcomes for women at or beyond term                                                   | Labour induction vs expectant management        | Apgar scores less than 7 @ 5 mins    | 8  | 5040   | 0    |
| Gupta 2012      | Position in the second stage of labour for women without epidural anaesthesia                                                  | Supine vs upright                               | Caesarian section                    | 12 | 4673   | 0    |
| Hauser 2013     | Serotonin and noradrenaline reuptake inhibitors (SNRIs) for fibromyalgia syndrome                                              | SNRI vs placebo                                 | Serious adverse effects              | 9  | 5845   | 0    |
| Ilic 2013       | Screening for prostate cancer                                                                                                  | Screening vs control                            | Prostate                             | 5  | 341342 | 0.59 |
| Jin 2012        | Dietary flavonoid for preventing colorectal neoplasms                                                                          | Flavanoids vs nil                               | Colorectal neoplasms                 | 4  | 73249  | 0.60 |

|                        |                                                                                                                       |                                                              |                                           |    |       |      |
|------------------------|-----------------------------------------------------------------------------------------------------------------------|--------------------------------------------------------------|-------------------------------------------|----|-------|------|
| Keay 2012              | Routine preoperative medical testing for cataract surgery                                                             | Preop testing vs control                                     | Total intraoperative adverse events       | 3  | 21531 | 0    |
| Kew 2013               | Long-acting beta2-agonists for chronic obstructive pulmonary disease                                                  | All LABA vs placebo                                          | Mortality                                 | 16 | 11490 | 0    |
| Lafuente-Lafuente 2012 | Antiarrhythmics for maintaining sinus rhythm after cardioversion of atrial fibrillation                               | Any antiarrhythmic vs none                                   | Mortality                                 | 24 | 15405 | 0    |
| Lazzerini 2013         | Specially formulated foods for treating children with moderate acute malnutrition in low- and middle-income countries | LNS vs blended food                                          | Death                                     | 6  | 6849  | 0    |
| Lv 2012                | Antihypertensive agents for preventing diabetic kidney disease                                                        | ACEi vs placebo                                              | Doubling of SCr                           | 3  | 10471 | 0.58 |
| Main 2013              | Hormone therapy for preventing cardiovascular disease in post-menopausal women                                        | Estrogen vs placebo in primary prevention                    | Death – CV causes                         | 2  | 10961 | 0    |
| Manser 2013            | Screening for lung cancer                                                                                             | More frequent CXR screening vs less frequent                 | Mortality                                 | 4  | 81303 | 0    |
| Marjoribanks 2012      | Long term hormone therapy for perimenopausal and postmenopausal women                                                 | Conjugated equine oestrogen 0.625mg +P for 3 years vs none   | Death by any cause                        | 3  | 18075 | 0    |
| Marti-Carvajal 2012    | Human recombinant protein C for severe sepsis and septic shock in adult and paediatric patients                       | Activated protein C vs placebo- Pediatric and adult patients | Central nervous system bleeding events    | 2  | 2143  | 0    |
| Marti-Carrajal 2013    | Homocysteine-lowering interventions for preventing cardiovascular events                                              | Homocysteine lowering vs no treatment                        | Myocardial infarction                     | 11 | 43780 | 0    |
| Meremikwu 2012         | Intermittent preventive treatment for malaria in children living in areas with seasonal transmission                  | Intermittent preventive treatment vs placebo                 | Skin rash                                 | 3  | 5227  | 0    |
| Moberley 2013          | Vaccines for preventing pneumococcal infection in adults                                                              | Vaccination vs placebo                                       | Mortality (all causes, all studies)       | 14 | 47560 | 0.76 |
| Moller 2012            | Off-pump versus on-pump coronary artery bypass grafting for ischaemic heart disease                                   | Off pump vs on pump CAGS                                     | MI                                        | 30 | 7604  | 0    |
| Neilsen 2013           | Fetal electrocardiogram (ECG) for fetal monitoring during labour                                                      | Fetal ECG (ST analysis) plus CTG vs CTG alone                | Cord pH < 7.05 & base deficit > 12 mmol/L | 5  | 14574 | 0.73 |
| Obiero 2012            | Topical microbicides for prevention of sexually transmitted infections                                                | SAVVY vs placebo                                             | HIV incidence                             | 2  | 4295  | 0.25 |
| Palmer 2013            | Antiplatelet agents for chronic kidney disease                                                                        | Antiplatelet agents vs control                               | Fatal or non-fatal stroke                 | 9  | 9232  | 0.69 |
| Pouwer 2012            | Long-acting FSH versus                                                                                                | Long-acting FSH                                              | Ectopic                                   | 3  | 1963  | 0    |

|               |                                                                                            |                                             |                           |    |       |      |
|---------------|--------------------------------------------------------------------------------------------|---------------------------------------------|---------------------------|----|-------|------|
|               | daily FSH for women undergoing assisted reproduction                                       | vs daily FSH                                | pregnancy                 |    |       |      |
| Rees 2013     | Selenium supplementation for the primary prevention of cardiovascular disease              | Selenium supplementation vs no intervention | CVD mortality             | 2  | 18452 | 0.58 |
| Singata 2013  | Restricting oral fluid and food intake during labour                                       | Any restriction vs some food or drink       | Apgar scores <7 at 5 mins | 2  | 2486  | 0    |
| Tuncalp 2012  | Prostaglandins for preventing postpartum haemorrhage                                       | Oral misoprostal vs injectable uterotonics  | Blood transfusion         | 14 | 28213 | 0    |
| Webster 2013  | Clinically-indicated replacement versus routine replacement of peripheral venous catheters | Clinically indicated vs routine change      | Phlebitis per device days | 5  | 23613 | 0    |
| Wiysonge 2012 | Beta-blockers for hypertension                                                             | Beta-blockers vs placebo                    | Total mortality           | 4  | 23613 | 0    |
| Yue 2013      | Linezolid versus vancomycin for skin and soft tissue infections                            | Linezolid vs Vancomycin                     | Mortality                 | 3  | 2352  | 0    |
